# Supplementary material for: Preparation of 5-unsubstituted 4-formylpyrrole-2-carboxylates and conversion to cycloalkano-oligopyrroles †
Source: Royal Society of Chemistry journal article supplement (doi:10.1039/b003360j), 2000-01-01
Supplement: b003360j.doc [file b003360j.doc]

# Supplementary Information

Experimental procedure for preparation of **6a**, **6b**, **6d**, **10b**, **10d**, **11b** and **11d**

**Ethyl 4-formylpyrrole-2-carboxylate (6a)**

To a stirred solution of nitro acetal **1** (1.5 g, 11.1 mmol) in acetonitrile (4.5 mL) were added triethylamine (0.15 mL, 1.11 mmol) and 37% formalin (0.9 g, 11.1 mmol) in acetonitrile (6 mL) at 0 ˚C. After 18 h, water (30 mL) and EtOAc (30 mL) were added. The organic layer was separated and the aqueous layer was extracted with EtOAc (2 x 20 mL). The combined organic layer was washed with water (2 x 30 mL) and brine (30 mL), dried over Na2SO4 and concentrated. The volatile impurities such as the starting material and the solvent were removed by the bulb-to-bulb distillation about 80 ˚C (10 mmHg) to give 0.85 g of the crude 1,1-dimethoxy-2-nitro-3-propanol(**2a**) as a pale yellow oil. The nitro alcohol **2a** was contaminated with 1,1-dimethoxy-2-hydroxymethyl-2-nitro-3-propanol (**3a**). The ratio (**2a**:**3a** = 8:1) was determined by 1H NMR. **2a**: H 2.26 (t, 1H, *J* = 6.8), 3.47 (s, 6H), 4.14 (m, 2H), 4.71 (m, 1H) and 4.88 (d, 1H, *J* = 7.3); C 55.4, 55.7, 60.41, 88.39 and 102.06. **3a**: H (typical signals) 2.61 (t, 2H, *J* = 6.1), 3.56 (s, 6H) and 4.89 (d, 1H, *J* = 11.2).

To a stirred solution of the above mixture (0.85 g) in THF (4 mL) were added acetic anhydride (0.5 mL) and DMAP (2 mg) at -65 ˚C. After 18 h, aqueous saturated NaHCO3 (10 mL) and EtOAc (10 mL) were added. The organic layer was separated and the aqueous layer was extracted with EtOAc (3 x 20 mL). The combined organic layer was washed with water (2 x 20 mL) and brine (20 mL), dried over Na2SO4 and concentrated to give 0.85 g of a crude mixture of 3-acetoxy-1,1-dimethoxy-2-nitropropane (**4a**) and 3-acetoxy-2-acetoxymethyl-1,1-dimethoxy-2-nitropropane (**5a**) as an orange oil. **4a**: H 2.07 (s, 3H), 3.43 (s, 3H), 3.45 (s, 3H), 4.49 (dd, 1H, *J* = 12.5, 9.3), 4.58 (dd, 1H, *J* = 12.5, 3.4), 4.78 (d, 1H, *J* = 12.5) and 4.90 (m, 1H); C (typical signals) 14.6, 17.1, 20.9, 53.2, 55.3, 55.5, 55.9, 88.1, 90.4, 100.9, 101.7 and 169.5. **5a**: H (typical signals) 2.08 (s, 6H), 3.55 (s, 3H), 3.60 (s, 3H), 4.63 (d, 2H, *J* = 12.5), 4.70 (d, 2H, *J* = 12.5) and 4.85 (m, 1H)

To a stirred solution of above mixture (0.85 g) including the -nitro acetate **4a** contaminated **5a** (ratio 8:1) in anhydrous THF (20 mL) were added dropwise ethyl isocyanoacetate (0.51 mL, 4.4 mmol) and DBU (1.3 mL, 8.8 mmol) at -78 ˚C. After 18 h, 1 mol/L HCl (20 mL) and CHCl3 (20 mL) were added. The organic layer was separated and the aqueous layer was extracted with CHCl3 (3 x 20 mL). The combined organic layer was washed with saturated NaHCO3 (30 mL), water (3 x 20 mL) and brine (30 mL), dried over Na2SO4 and concentrated. The residue was chromatographed on silica gel (10 %, EtOAc/hexane) to give crude **6a**. Recrystallization from EtOAc/hexane afforded 0.18 g (9% from **1**) of pure **6a** as yellow crystals: mp 105 °C; IR (KBr) 3139 and 1681 cm-1; H 1.38 (t, 3H, *J* = 7.3), 4.36 (q, 2H, *J* = 7.3), 7.31 (m, 1H), 7.56 (dd, 1H, *J* = 3.4, 1.3), 9.53 (brs, 1H) and 9.85 (s, 1H); C14.3, 61.1, 114.1, 125.1, 127.6, 128.3, 160.8 and 185.6; EI/MS 167 (M+, 42), 120 (50) and 75 (100). Anal. Calcd for C8H9NO3: C, 57.48; H, 5.43; N, 8.38. Found: C, 57.31; H, 5.47; N, 8.38%.

**Ethyl 4-formyl-3-methylpyrrole-2-carboxylate (6b)**

To a stirred solution of nitro compound **1** (26 g, 0.19 mmol) and distilled acetaldehyde (15 mL, 0.29 mmol) was added Amberlyst A21 (30 g) at 0 ˚C. The mixture was warmed to 10 ˚C and stirred for 18 h. The reaction mixture was filtered through a Celite pad, which was washed with EtOAc (3 x 50 mL). The EtOAc layer was washed with water (2 x 50 mL) and brine (50 mL), dried over Na2SO4 and concentrated. The volatile impurities such as the starting material and solvents were removed by the bulb-to-bulb distillation about 80 ˚C (10 mmHg) to give 26.1 g (76%) of crude 1,1-dimethoxy-2-nitro-3-butanol(**2b**) as a pale yellow oil. **2b** (8:1 mixture): IR (neat) 3471, 2979, 2841, and 1554 cm-1; H 1.29 (d, 3H, *J* = 7.2, minor isomer), 1.32 (d, 3H, *J* = 6.8, major isomer), 2.39 (d, 1H, *J* = 9.8, major isomer), 3.06 (d, 1H, *J* = 2.9, minor isomer), 3.45 (s, 3H, major isomer), 3.45 (s, 3H, minor isomer), 3.50 (s, 3H, minor isomer), 3.53 (s, 3H, major isomer), 4.25 (m, 1H), 4.15 (dd, 1H, *J* = 7.6, 3.4, major isomer), 4.56 (dd, 1H, *J* = 7.6, 6.4, minor isomer), 4.94 (d, 1H, *J* = 7.6, minor isomer) and 4.99 (d, 1H, *J* = 7.6); C (typical signals) 18.8, 20.0, 54.9, 55.1, 55.5, 56.1, 65.8, 66.8, 90.9, 92.2, 102.1 and 103.1.

To a stirred solution of the crude nitro alcohol **2b** (26.1 g, 145 mmol) in THF (100 mL) were added acetic anhydride (14 mL) and DMAP (0.07 g) at 0 ˚C. The mixture was warmed to 10 ˚C and stirred for 18 h. Aqueous saturated NaHCO3 (50 mL) and EtOAc (50 mL) were added. The organic layer was separated and the aqueous layer was extracted with EtOAc (3 x 30 mL). The combined organic layer was washed with water (2 x 30 mL) and brine (30 mL), dried over Na2SO4 and concentrated to give 32.1 g (100%) of crude 3-acetoxy-1,1-dimethoxy-2-nitrobutane (**4b**) as an orange liquid: IR (neat) 2945, 2843, 1749 and 1560 cm-1; H 1.35 (d, 3H, *J* = 6.4, major isomer), 1.38 (d, 3H, *J* = 6.7, minor isomer), 2.07 (s, 3H, major isomer), 2.23 (s, 3H, minor isomer), 3.41 (s, 3H, minor isomer), 3.42 (s, 3H, minor isomer), 3.44 (s, 3H, major isomer), 3.45 (s, 3H, major isomer), 4.61 (d, 1H, *J* = 5.8, minor isomer), 4.63 (d, 1H, *J* = 5.5, major isomer), 4.84 (m, 1H, major isomer), 4.92 (m, 1H, minor isomer), 5.30 (m, 1H, minor isomer) and 5.40 (m, 1H, major isomer); C (typical signals) 14.6, 17.1, 20.9, 53.2, 55.3, 55.5, 55.9, 88.1, 90.4, 100.9, 101.7 and 169.5.

To a stirred solution of the crude -nitro acetate **4b** (32.1 g, 145 mmol) in anhydrous THF (220 mL) were added dropwise ethyl isocyanoacetate (15 mL, 145 mmol) and DBU (41 mL, 290 mmol) at 0 ˚C. After the mixture was warmed to 10 ˚C and stirred for 18 h, 1 mol/L HCl (50 mL) and CHCl3 (50 mL) were added. The organic layer was separated and the aqueous layer was extracted with CHCl3 (3 x 30 mL). The combined organic layer was washed with saturated NaHCO3 (50 mL), water (3 x 30 mL) and brine (50 mL), dried over Na2SO4 and concentrated. The residue was chromatographed on silica gel (10% EtOAc/hexane) to give crude **6b**. Recrystallization from EtOAc/hexane afforded 15.2 g (60%) of pure **6b** as yellow crystals: mp 113-115 °C; IR (KBr) 3272 and 1558 cm-1; H 1.39 (t, 3H, *J* =7.2), 2.62 (s, 3H), 4.37 (q, 2H, *J* = 7.2), 7.47 (d, 1H, *J* = 3.4), 9.6 (brs, 1H) and 9.93 (s, 1H); C (typical signals) 14.3, 14.4, 60.8, 126.1, 128.6, 129.0, 130.4, 161.6 and 186.2; EI/MS 181 (M+, 92), 135 (100) and 107 (38). Anal. Calcd for C9H11NO3: C, 59.66; H, 6.12; N, 7.73. Found: C, 59.41; H, 5.97; N, 7.85%.

**Ethyl 3-(*p*-bromophenyl)-4-formylpyrrole-2-carboxylate (6d)**

1-(*p*-Bromophenyl)-3,3-dimethoxy-2-nitro-1-propanol (**2d**) was obtained in 35% yield from the reaction of the nitro compound **1** and *p*-bromobenzaldehyde in the presence of Bu4NF·3H2O, Et3N and tBuMe3SiCl in THF. **2d**: yellow oil; IR (neat) 3479, 2939, 1558 and 1087; H 3.18 (d, 1H, *J* = 7.3, major isomer), 3.43 (s, 1H, minor isomer), 3.46 (s, 1H, minor isomer), 3.47 (s, 1H, major isomer), 3.51 (s, 1H, major isomer), 3.67 (brs, 1H, minor isomer), 4.80 (m, 1H, both isomers), 4.89 (d, 1H, *J* = 7.3, major isomer), 5.00 (d, 1H, *J* = 7.3, minor isomer), 5.14 (m, 1H, both isomers), 5.23 (m, 1H, minor isomer), 7.21 (m, 2H, minor isomer), 7.25 (m, 2H, major isomer), 7.49 (m, 2H, major isomer) and 7.51 (m, 2H, minor isomer); H (typical signals) 55.0, 55.3, 55.7, 56.1, 71.3, 72.5, 90.9, 91.7, 101.9, 103.2, 122.7, 123.1, 127.33, 128.5, 131.8, 132.0, 136.3 and 137.2.

1-Acetoxy-1-(*p*-bromophenyl)-3,3-dimethoxy-2-nitropropane (**4d**) was obtained in quantitative yield from the reaction of the crude nitro alcohol **2d** and Ac2O in the presence of DMAP in THF. **4d**: yellow oil; IR (NaCl) 2947, 1751 and 1542; H 2.07 (s, 3H, major isomer), 2.15 (s, 3H, minor isomer), 3.38 (S, 3H, major isomer), 3.42 (s, 3H, minor isomer), 3.42 (s, 3H, minor isomer), 3.44 (s, 3H, major isomer), 4.60 (d, 1H, *J* = 8.3, major isomer), 4.61 (d, 1H, *J* = 6.8, minor isomer), 5.07 (dd, 1H, *J* = 8.3, 7.3, major isomer), 5.42 (dd, 1H, *J* = 7.8, 5.3 minor isomer), 6.19 (d, 1H, *J* = 5.3, minor isomer), 6.29 (d, 1H, *J* = 7.8, major isomer), 7.22 (m, 2H, both isomers) and 7.53 (m, 2H, both isomers); C (typical signals) 14.2, 21.0, 55.0, 55.3, 55.7, 56.1, 71.3, 72.5, 90.9, 91.7, 101.9, 103.2122.7, 123.1, 127.3, 128.6, 131.8, 132.0, 136.3 and 137.2.

Ethyl 3-(*p*-bromophenyl)-4-formylpyrrole-2-carboxlate (**6d**) was obtained in 38% yield from the reaction of the crude -nitro acetate **4d** in the presence of DBU in THF. **6d**: yellow crystals; mp 145 °C; IR (KBr) 1693 and 1670 cm-1; H 1.18 (t, 3H, *J* = 7.3), 4.20 (q, 2H, *J* = 7.3), 7.30 (m, 2H), 7.4 (m, 2H), 7.63 (m, 1H), 9.66 (m, 1H), and 9.92 (brs, 1H); C (typical signals) 14.0, 61.0, 120.8, 122.3, 125.7, 126.0, 130.6, 130.9, 131.4, 132.3, 160.6, and 186.4; EI/MS 321 (M+, 98), 276 (62), 249 (54) and 196 (46). Anal. Calcd for C14H12BrNO3: C, 52.2; H, 3.75; N, 4.35. Found: C, 52.19; H, 3.72; N, 4.27%.

**Triethyl 3,7,11-trimethylcyclonona[1,2-*b*:4,5-*b’*:7,8-*b’’*]tripyrrole-2,6,10-tricarboxylate (10b) and tetraethyl 3,7,11,15-tetramethylcyclododeca[1,2-*b*:4,5-*b’*:7,8-*b’’*:10,11-*b’’’*]tetrapyrrole-2,6,10,14-tetracarboxylate (11b)**

To a stirred solution of crude **7b** prepared from **6b** (180 mg, 2 mmol) as above in anhydrous CHCl3 (2.5 mL) was added *p*-TsOH (40.0 mg). After 18 h, water (10 mL) and CHCl3 (20 mL) were added. The organic layer was separated and the aqueous layer was extracted with CHCl3 (3 x 10 mL). The combined organic layer was washed with saturated NaHCO3 (20 mL), water (3 x 10 mL) and brine (20 mL), dried over Na2SO4 and concentrated. The residue was chromatographed on silica gel (20% EtOAc/hexane) to give a crude mixture of **10b** and **11b**. Recrystallization from EtOAc/hexane afforded 140 mg (83%) of a mixture of **10b** and **11b** (2:1) as colorless crystals: IR (KBr) 3303, 2981 and 1585 cm-1; EI/MS 495 (M+, 100), 283 (24), and 258 (24). Anal. Calcd for (C9H11NO2)n: C, 65.44; H, 6.71; N, 8.48. Found: C, 64.94; H, 6.76; N, 8.24%; **10b**:H 1.31 (t, 9H, *J* = 14.6), 2.38 (s, 9H), 3.55 (d, 3H, *J* = 15.3), 4.08 (d, 3H, *J* = 15.3), 4.30 (q, 6H, *J* = 7.3) and 8.91 (brs, 3H). **11b**: H 1.34 (t, 12H, *J* = 7.0), 2.25 (s, 12H), 3.48 (brs, 8H), 4.29 (q, 8H, *J* = 7.0) and 8.50 (brs, 3H).

**Triethyl 3,7,11-tri(*p*-bromophenyl)cyclonona[1,2-*b*:4,5-*b’*:7,8-*b’’*]tripyrrole-2,6,10-tricarboxylate (10d) and tetraethyl-3,7,11,15-tetra(*p*-bromophenyl)cyclododeca[1,2-*b*:4,5-*b’*:7,8-*b’’*:10,11-*b’’’*]tetrapyrrole-2,6,10,14-tetracarboxylate (11d)**

The mixture of **10d** and **11d** were obtained from the formyl pyrrole **6d** in 39% yield: IR (KBr) 3437, 3287, 1714, 1684 and 1668 cm-1; EI/MS 918 (M+, 100), 873 (14) and 839 (34); Anal. Calcd for (C14H12NO2Br)n: C, 54.92; H, 3.96; N, 4.58. Found: C, 54.74; H, 3.96; N, 4.40%; **10d**: H 1.16 (t, 9H, *J* = 7.3), 3.53 (d, 3H, *J* = 15.1), 4.00 (d, 3H, *J* = 15.1), 4.08 (q, 6H, *J* = 7.3), 7.22 (m, 12H), 7.64 (m, 12H) and 7.76 (brs, 3H). **11d**: H 0.89 (t, 12H, *J* = 6.8), 3.50 (s, 8H), 4.11 (q, 8H, *J* = 7.8), 7.11 (m, 16H), 7.52 (m, 16H) and 8.49 (brs, 4H).
